# Supplementary material for: Identification and reconstruction of novel antibiotic resistance genes from metagenomes
Source: PubMed Central journal article supplement (PMC6444489; doi:10.1186/s40168-019-0670-1), 2019-04-01
Supplement: 40168_2019_670_MOESM1_ESM.pdf [file 40168_2019_670_MOESM1_ESM.pdf]

## Estimation of sensitivity

Repeat N times

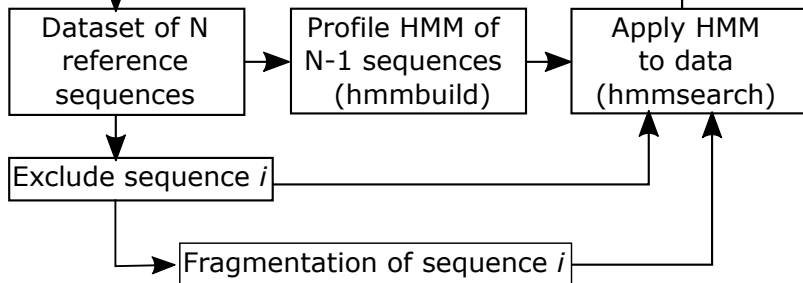

## Estimation of specificity

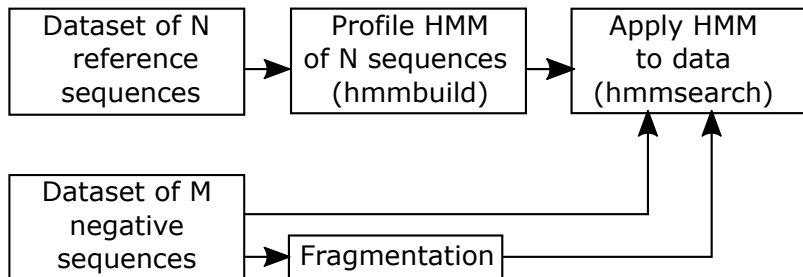

Profile HMM with optimized threshold score
