# Supplementary material for: Identification and reconstruction of novel antibiotic resistance genes from metagenomes
Source: PubMed Central journal article supplement (PMC6444489; doi:10.1186/s40168-019-0670-1), 2019-04-01

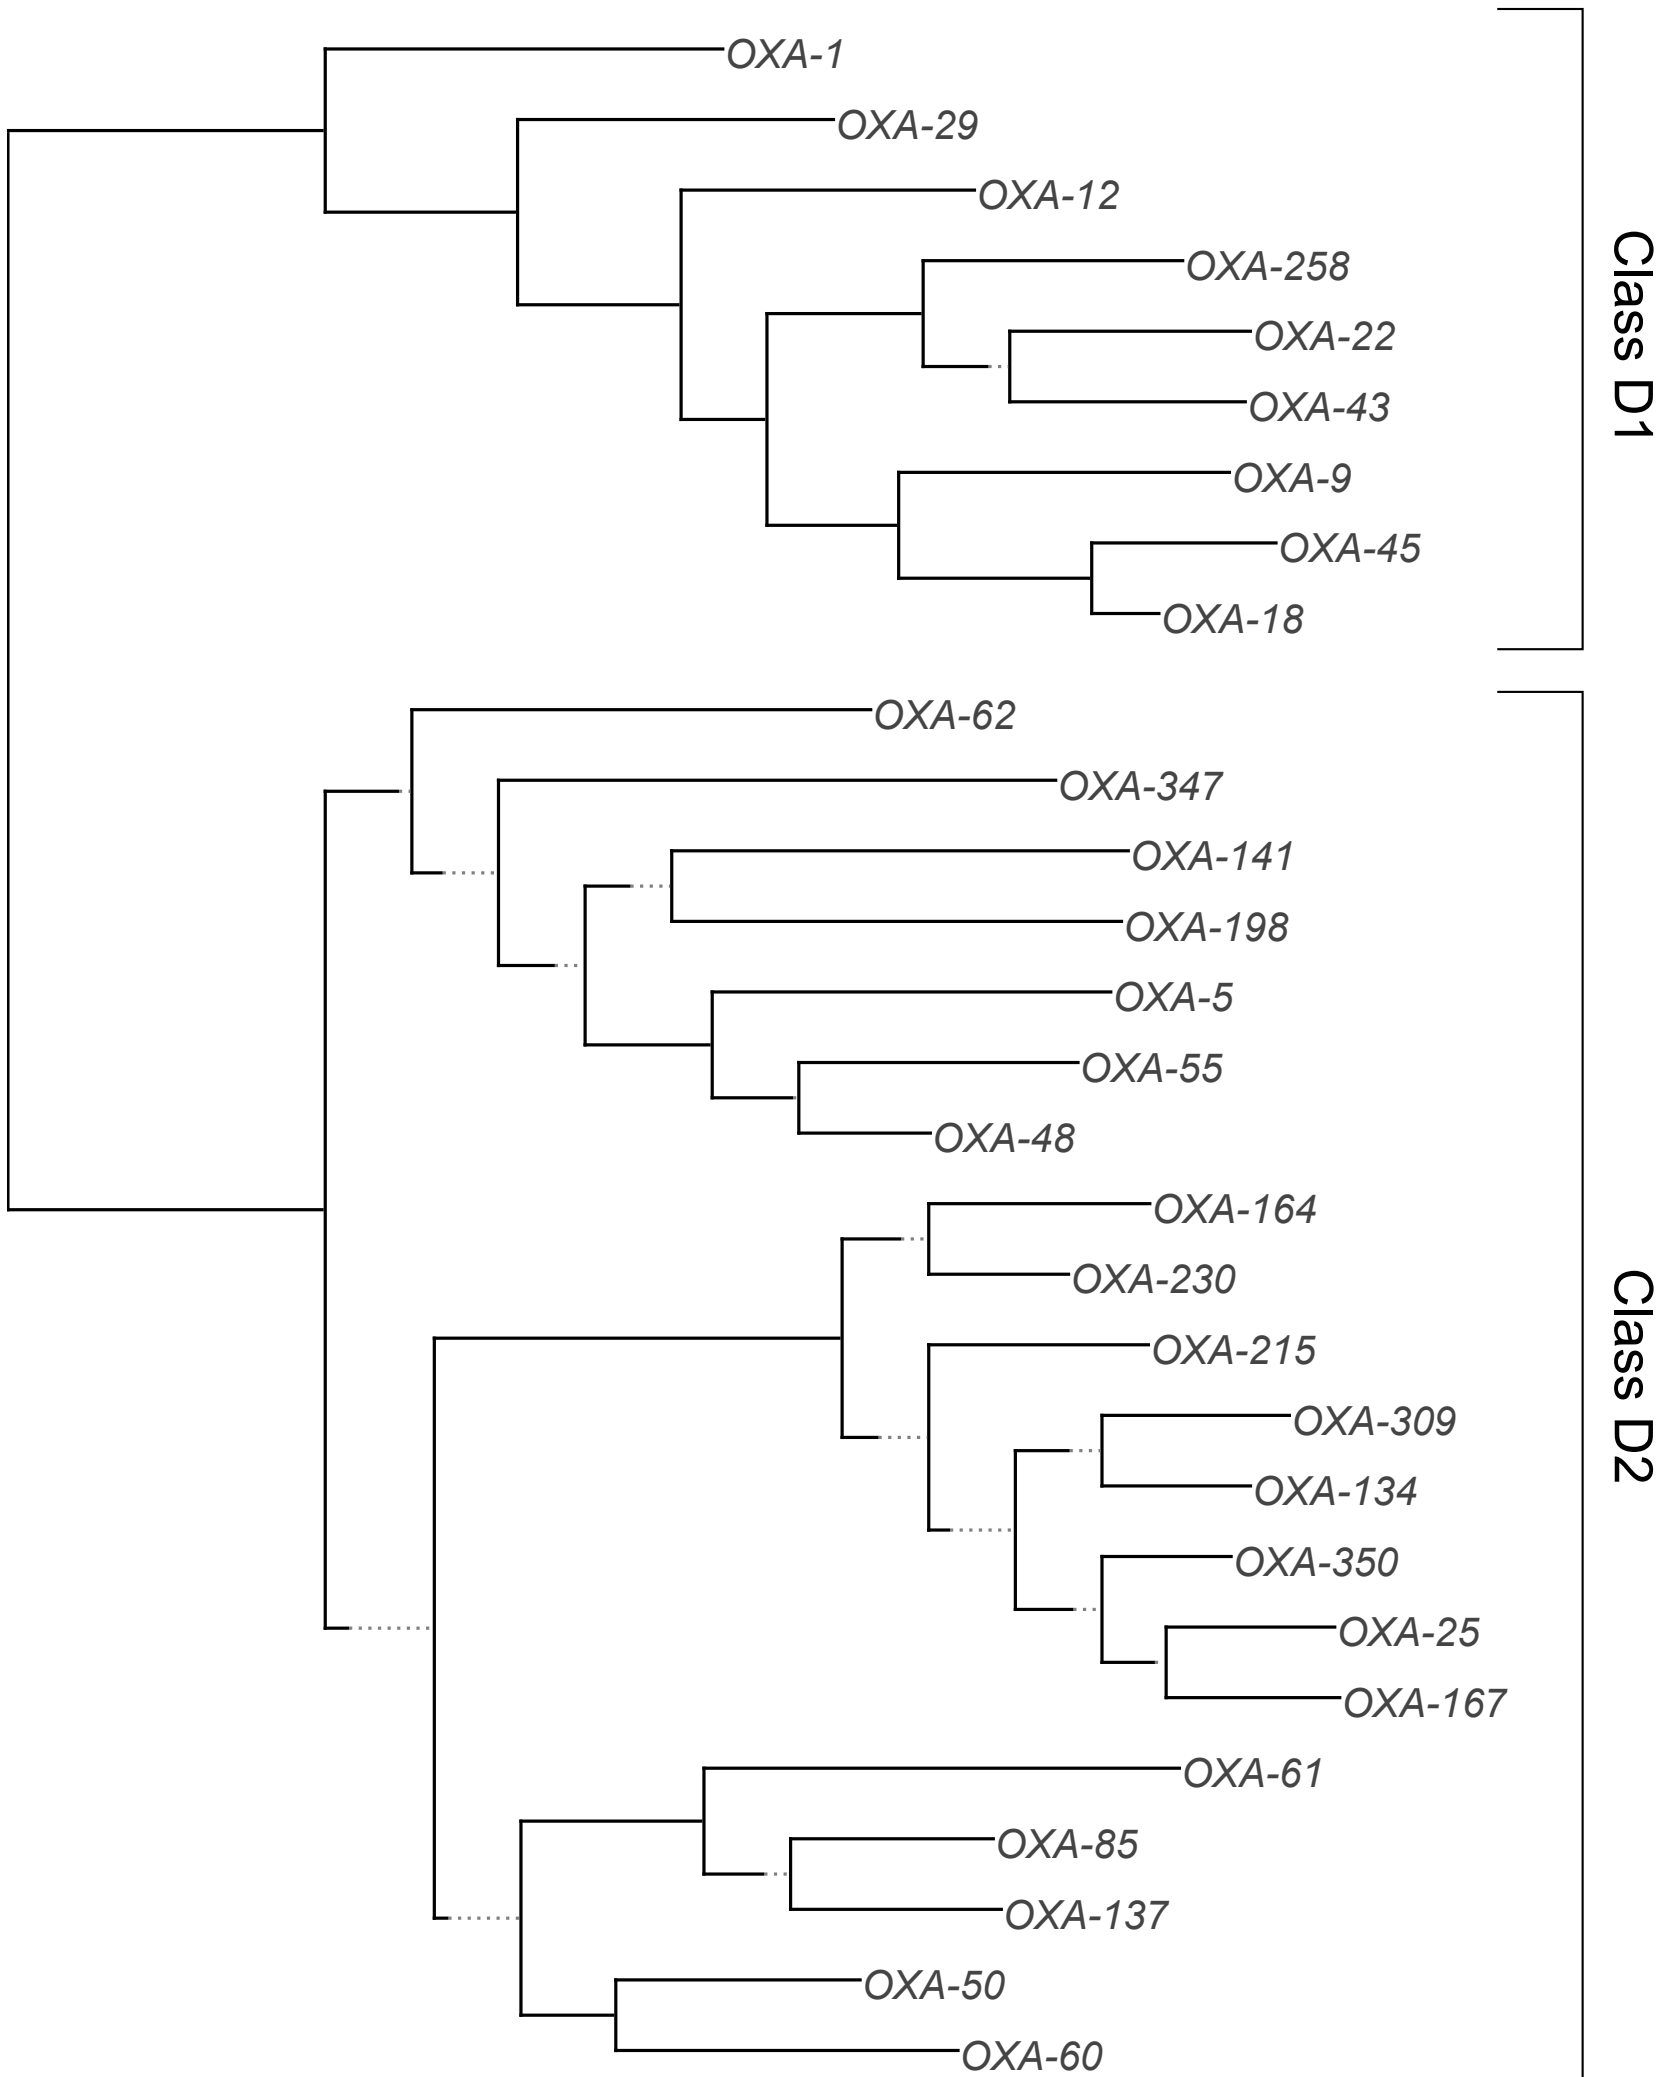

Supplement: 40168_2019_670_MOESM4_ESM.pdf [file 40168_2019_670_MOESM4_ESM.pdf]
